# Supplementary material for: Comparative Study on Handheld, Modular, and Laboratory Raman Instruments for the Analysis of Colon Tissues and Colorectal Polyps
Source: MDPI journal article supplement (doi:10.3390/app14020791), 2024-01-17
Supplement: s1 [file s1]

## Supplementary Materials

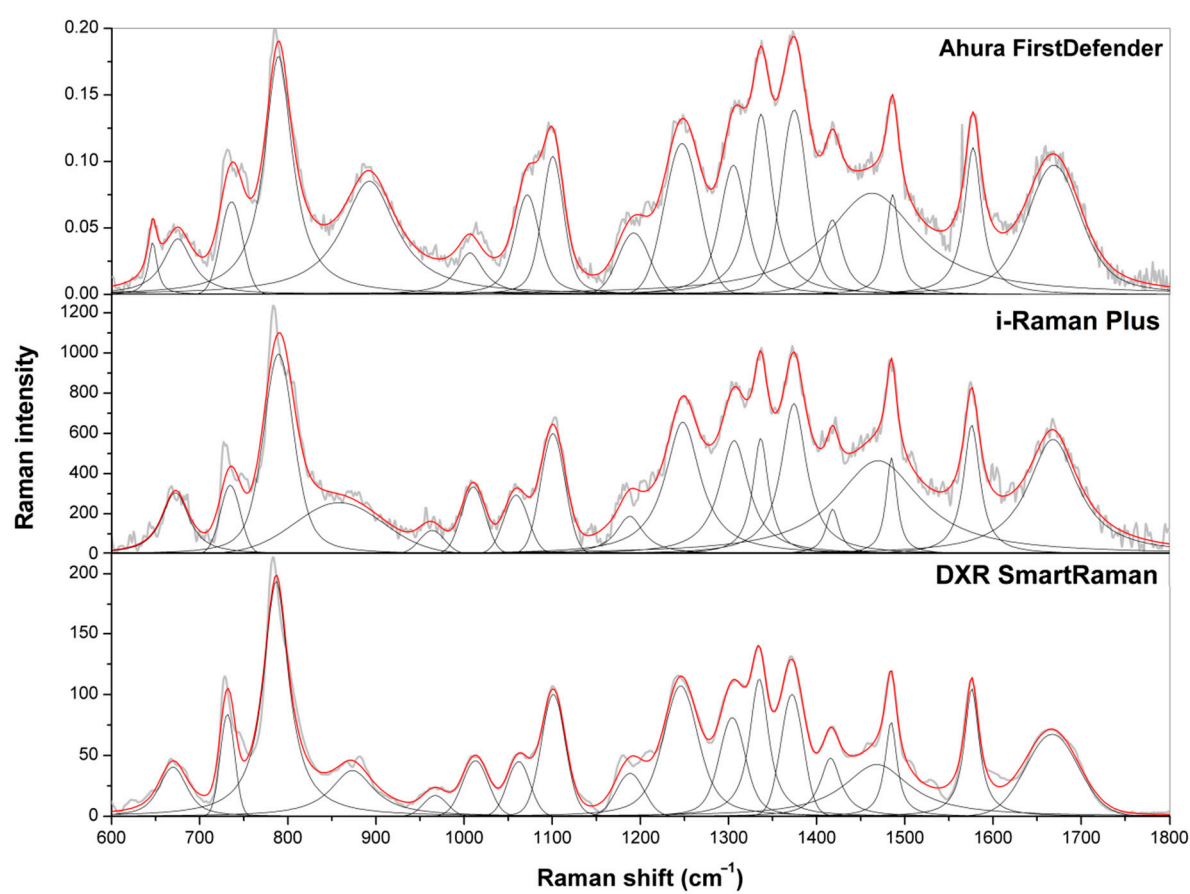

**Figure S1.** Peak decomposition of the Raman spectra of calf thymus DNA obtained with handheld (top), modular (middle), and laboratory (bottom) instruments.

**Table S1.** Raman band assignments for the reference compounds [29–34,36–39,41,42].

| Reference compound        | Instrument/Raman shift (cm <sup>-1</sup> )* |              |            | Vibrational mode                                   | Moiety           |
|---------------------------|---------------------------------------------|--------------|------------|----------------------------------------------------|------------------|
|                           | Ahura                                       | i-Raman Plus | SmartRaman |                                                    |                  |
| Calf Thymus DNA           | 1662                                        | 1664         | 1663       | $\nu(\text{C=O})$                                  | C, T             |
|                           | 1577                                        | 1574         | 1576       | $\nu(\text{C=C})$                                  | A, G             |
|                           | 1530                                        | 1529         | 1528       | $\nu(\text{C=N})$                                  | C                |
|                           | sh                                          | sh           | 1504       | $\delta(\text{NH}_2)$ , ring                       | A                |
|                           | 1485                                        | 1482         | 1484       | ring                                               | G, A             |
|                           | sh                                          | sh           | 1462       | $\delta(5'\text{CH}_2)$                            | dRib             |
|                           | 1419                                        | 1416         | 1418       | $\delta(2'\text{CH}_2)$                            | dRib             |
|                           | 1372                                        | 1370         | 1371       | ring, $\delta_s(\text{CH}_3)$                      | T, A, C          |
|                           | 1335                                        | 1332         | 1334       | $\nu(\text{C=N})$                                  | A, G             |
|                           | 1306                                        | 1306         | 1310       | ring                                               | A, C             |
|                           | 1242                                        | 1241         | 1242       | ring                                               | C, T             |
|                           | 1209                                        | 1205         | 1207       | ring                                               | C, T             |
|                           | 1182                                        | 1179         | 1179       | ring                                               | G, T, C          |
|                           | 1099                                        | 1100         | 1100       | $\nu_s(\text{PO}_2^-)$                             | P                |
|                           | sh                                          | 1060         | 1066       | $\nu(\text{C-O})$                                  | dRib             |
|                           | 1013                                        | 1010         | 1009       | ring, $\nu(\text{C-O})$                            | T, G, C, dRib    |
|                           | 962                                         | 956          | 967        | $\nu(\text{C-O})$                                  | dRib             |
|                           | 890                                         | 876          | 881, 867   | $\nu(\text{C-O})$                                  | dRib-P           |
|                           | 786                                         | 781          | 783        | ring breath                                        | T, C             |
|                           | sh                                          | sh           | 744        | ring breath                                        | T                |
|                           | 733                                         | 728          | 728        | ring breath                                        | A                |
|                           | 670                                         | 671          | 667        | ring breath                                        | G                |
| Human Serum Albumin (HSA) | 1659                                        | 1655         | 1655       | amide I                                            | backbone         |
|                           | 1615                                        | 1618         | 1615       | $\nu(\text{C=C})$                                  | Tyr, Trp, Phe    |
|                           | 1606                                        | 1605         | 1606       | $\nu(\text{C=C})$                                  | Tyr, Trp, Phe    |
|                           | 1584                                        | 1584         | 1585       | $\nu(\text{C=C})$                                  | Phe, Trp         |
|                           | 1451                                        | 1449         | 1449       | $\delta(\text{CH}_2)$ , $\delta_{as}(\text{CH}_3)$ | side chains      |
|                           | 1340                                        | 1339         | 1337       | $\delta(\text{C}_\alpha\text{-H})$                 | backbone, Trp    |
|                           | sh                                          | 1319         | 1317       | $\tau(\text{CH}_2)$                                | side chains      |
|                           | sh                                          | 1275         | 1270       | amide III                                          | CONH             |
|                           | 1209                                        | 1209         | 1208       | $\delta(\text{C-H})$                               | Phe, Tyr         |
|                           | 1171                                        | 1178         | 1174       | $\delta(\text{C-H})$                               | Tyr              |
|                           | 1157                                        | 1161         | 1158       | $\nu(\text{C-C})$ , $\nu(\text{C-N})$              | backbone         |
|                           | 1124                                        | 1126         | 1126       | $\nu(\text{C-C})$ , $\nu(\text{C-N})$              | Trp              |
|                           | 1103                                        | 1104         | 1102       | $\nu(\text{C-C})$ , $\nu(\text{C-N})$              | backbone         |
|                           | 1075                                        | 1083         | 1081       | $\nu(\text{C-C})$ , $\nu(\text{C-N})$              | backbone         |
|                           | sh                                          | 1056         | 1053       | $\nu(\text{C-C})$ , $\nu(\text{C-N})$              | backbone         |
|                           | 1032                                        | 1032         | 1032       | ring                                               | Phe              |
|                           | 1004                                        | 1003         | 1003       | ring breath                                        | Phe              |
|                           | 960                                         | 960          | 960        | $\nu(\text{C-C})$                                  | Trp, Val         |
|                           | 940                                         | 938          | 939        | $\nu(\text{C-C})$                                  | backbone         |
|                           | 900                                         | 894          | 894        | $\nu(\text{C-C})$                                  | backbone         |
|                           | 854                                         | 851          | 866,851    | ring                                               | Trp, Tyr         |
|                           | 828                                         | 827          | 827        | ring breath                                        | Tyr              |
|                           | 749                                         | 744          | 744        | $\rho(\text{CH}_2)$                                | side chains, Trp |
|                           | 672                                         | 667          | 667        | $\nu(\text{C-S})$                                  | Cys              |
|                           | 647                                         | 644          | 644        | ring                                               | Tyr              |
|                           | 623                                         | 622          | 622        | ring                                               | Phe              |

| Reference compound           | Instrument/Raman shift (cm <sup>-1</sup> ) |              |            | Vibrational mode                                                                   | Moiety             |
|------------------------------|--------------------------------------------|--------------|------------|------------------------------------------------------------------------------------|--------------------|
|                              | Ahura                                      | i-Raman Plus | SmartRaman |                                                                                    |                    |
| Rat Tail Collagen Type I     | 1672br                                     | 1672         | 1676       | amide I                                                                            | backbone           |
|                              |                                            | 1604         | 1605       | $\nu_{as}(\text{CO}_2^-)$                                                          | Asp, Glu           |
|                              | 1556                                       | 1553         | 1556       | indole ring                                                                        | Trp                |
|                              | 1453                                       | 1449         | 1449       | $\nu(\text{C}=\text{N})$ , $\delta(\text{CH}_2)$                                   | backbone, Pro, Hyp |
|                              | 1342                                       | 1342         | 1331       | $\omega(\text{CH}_2)$ , $\omega(\text{CH}_3)$                                      | Pro, Ala           |
|                              |                                            | 1320         | 1308       | $\tau(\text{CH}_3)$                                                                | side chains        |
|                              | 1268                                       | 1270         | 1268       | amide III, $\omega(\text{CH}_2)$                                                   | backbone, Pro, Hyp |
|                              | 1246                                       | 1245         | 1239       | amide III                                                                          | backbone           |
|                              | 1216                                       | 1207         | 1214       | $\omega$ , $\tau(\text{CH}_2)$                                                     | Pro                |
|                              | 1195                                       | 1181         | 1178       | $\omega(\text{CH}_2)$ , $\rho(\text{CH}_3)$                                        | Pro, Ala           |
|                              | 1097                                       | 1101         | 1097       | $\rho(\text{CH}_2)$                                                                | Pro                |
|                              | 1066                                       | 1062         | 1067       | $\omega(\text{CH}_2)$ , $\nu(\text{CN})$                                           | Pro, Hyp           |
|                              | 1032                                       | 1032         | 1033       | ring breath                                                                        | Pro, Phe           |
|                              | 1002                                       | 1003         | 1004       | ring breath                                                                        | Pro, Phe           |
|                              | sh                                         | sh           | 976        | $\nu(\text{C}-\text{C})$                                                           | backbone           |
|                              | 948                                        | 936          | 939        | $\nu(\text{C}-\text{C})$                                                           | backbone           |
|                              | 925                                        | 921          | 920        | ring                                                                               | Pro                |
|                              | sh                                         | 872          | 881        | ring                                                                               | Hyp                |
|                              | 862                                        | 854          | 867        | ring                                                                               | Pro                |
|                              | 816                                        | 818          | 816        | $\nu(\text{C}-\text{C})$                                                           | backbone           |
|                              | 790                                        | 779          | 788        | $\nu(\text{C}-\text{C})$                                                           | backbone           |
| Bacterial Sodium Hyaluronate | 1656                                       | 1655         | 1652       | amide I                                                                            | N-Ac               |
|                              | sh                                         | 1455         | 1456       | $\delta(\text{CH}_2)$ , $\delta_{as}(\text{CH}_3)$                                 | GlcNAc             |
|                              | 1410                                       | 1410         | 1410       | $\nu_s(\text{CO}_2^-)$                                                             | GlcA               |
|                              | 1371                                       | 1376         | 1374       | $\delta_s(\text{CH}_3)$                                                            | N-Ac               |
|                              | sh                                         | sh           | 1328       | amide III, $\delta(\text{C}-\text{H})$ , $\delta(\text{C}-\text{OH})$              | N-Ac               |
|                              | 1273                                       | 1269         | 1269       | $\omega(\text{CH}_2)$ , $\delta(\text{C}-\text{CH})$ ,                             | GlcNAc, ring       |
|                              | 1209                                       | 1206         | 1206       | $\tau(\text{CH}_2)$ , $\delta(\text{C}-\text{CH})$ , $\delta(\text{C}-\text{OH})$  | GlcNAc, ring       |
|                              | 1124                                       | 1124         | 1125       | $\nu(\text{C}-\text{O})$ , $\nu(\text{C}-\text{C})$ , $\delta(\text{C}-\text{OH})$ | pyranoid ring      |
|                              | 1084                                       | 1002         | 1097       | $\nu_{as}(\text{C}-\text{O}-\text{C})$                                             | glycosidic bond    |
|                              | sh                                         | 1045         | 1048       | $\nu(\text{C}-\text{O})$ , $\nu(\text{C}-\text{C})$ , $\delta(\text{C}-\text{OH})$ | pyranoid ring      |
|                              | 948                                        | 947          | 947        | amide V                                                                            | N-Ac               |
|                              | 900                                        | 897          | 896        | $\nu_s(\text{C}-\text{O}-\text{C})$ , $\delta(\text{C1}-\text{H})$                 | glycosidic bond    |
|                              | 804                                        | 810          | 807        | $\delta(\text{CO}_2^-)$                                                            | GlcA               |

\* br, broad; sh, shoulder;  $\nu$ , stretching;  $\delta$ , bending;  $\tau$ , twisting;  $\omega$ , wagging; A, G, C, and T, nucleic bases; P, phosphate diester, dRib, deoxyribose.

**Table S2.** Contribution of biological macromolecules in the Raman spectra of normal colon tissue [43–46,50–53].

| Instrument/Raman shift (cm <sup>-1</sup> )* |              |            | Reference compounds |     |            |    |
|---------------------------------------------|--------------|------------|---------------------|-----|------------|----|
| Ahura                                       | i-Raman Plus | SmartRaman | DNA                 | HSA | Collagen I | HA |
| 1656                                        | 1657         | 1657       |                     | +   |            | +  |
|                                             | sh           | 1636sh     |                     |     | +          |    |
| sh                                          | 1617         | 1617       |                     | +   |            |    |
| sh                                          | 1580         | 1582       | +                   |     |            |    |
| 1553                                        | 1558         | 1569, 1553 |                     |     | +          |    |
| 1531                                        | sh           | 1540, 1520 |                     |     |            |    |
|                                             | sh           | 1486sh     | +                   |     |            |    |
| 1446                                        | 1447         | 1446       |                     | +   |            |    |
| 1395                                        | sh           | 1396       |                     | +   | +          |    |
|                                             | 1381         | 1381       |                     |     | +          |    |
| sh                                          | sh           | 1363       |                     |     |            | +  |
| 1340                                        | 1339         | 1335       |                     | +   | +          |    |
|                                             | 1320         | 1314       | +                   |     |            | +  |
| 1304                                        | 1301         | 1303       |                     |     |            |    |
| 1267                                        | 1271         | 1267       |                     | +   | +          | +  |
|                                             | 1262         | 1257       |                     | +   |            |    |
|                                             |              | 1245sh     | +                   |     | +          |    |
|                                             | 1207         | 1209       | +                   | +   |            | +  |
|                                             | 1175         | 1175       | +                   | +   | +          |    |
| 1157                                        | sh           | 1159, 1150 |                     |     |            |    |
|                                             | 1125         | 1124       |                     | +   |            | +  |
|                                             | 1106         | sh         | +                   | +   |            | +  |
| 1075                                        | 1086         | 1082       |                     |     | +          |    |
|                                             | 1065         | 1068       | +                   |     |            | +  |
| sh                                          | 1032         | 1034       |                     | +   |            |    |
| 1005                                        | 1002         | 1004       |                     | +   | +          |    |
| 973                                         | 981          | 974        | +                   |     | +          |    |
|                                             | 958          | 960        |                     | +   |            | +  |
|                                             |              | 940        |                     | +   | +          |    |
| 929                                         | 934          | 930        |                     |     | +          |    |
|                                             | 907          | sh         |                     |     |            | +  |
| 882                                         | 874          | 880        | +                   |     | +          |    |
|                                             |              | 865        | +                   |     | +          | +  |
| 854                                         | 853          | 851        |                     | +   |            |    |
|                                             | 832          | 832        |                     | +   |            |    |
| 818                                         |              | 823        |                     |     | +          | +  |
|                                             |              | 801        |                     |     |            |    |
| 790                                         | 785          | 786        | +                   |     | +          |    |
|                                             |              | 773        |                     |     |            |    |
|                                             | 761          | 760        |                     |     | +          |    |
| 751                                         |              | 744        | +                   | +   |            | +  |
|                                             | sh           | 726        | +                   |     |            |    |
| 713                                         | 714          | 713        |                     |     |            |    |
| 680                                         | 695          | 694        |                     |     | +          |    |
|                                             | 673          | 666        | +                   | +   |            |    |
| 649                                         | 646          | 646        |                     | +   | +          |    |
| 615                                         | 622          | 622        |                     | +   | +          |    |
